# Supplementary material for: Exploration of benign deep eutectic solvent–water systems for the highly efficient production of furfurylamine from sugarcane bagasse via chemoenzymatic cascade catalysis
Source: Royal Society of Chemistry journal article supplement (doi:10.1039/d1gc03010h), 2021-01-01
Supplement: d1gc03010h1.pdf [file d1gc03010h1.pdf]

## Support Information

### Exploration of benign deep eutectic solvent–water systems for the highly efficient production of furfurylamine from sugarcane bagasse via chemoenzymatic cascade catalysis

Qing Li<sup>a,‡</sup>, Junhua Di<sup>b,‡</sup>, Xiaolong Liao<sup>a,‡</sup>, Jiacheng Ni<sup>b</sup>, Qi Li<sup>a</sup>,

Yu-Cai He<sup>a,b,\*</sup>, Cuiluan Ma<sup>a\*</sup>

<sup>a</sup> State Key Laboratory of Biocatalysis and Enzyme Engineering, Hubei Collaborative Innovation Center for Green Transformation of Bio-resources, Hubei Key Laboratory of Industrial Biotechnology, School of Life Sciences, Hubei University, Wuhan 430062, Hubei Province, P.R. China, [heyucaai2001@163.com](mailto:heyucaai2001@163.com), [macuiluan@163.com](mailto:macuiluan@163.com)

<sup>b</sup> National-Local Joint Engineering Research Center of Biomass Refining and High-Quality Utilization, Jiangsu Key Laboratory of Advanced Catalytic Materials and Technology, School of Pharmacy, Changzhou University, Changzhou 213164, Jiangsu Province, P.R. China, [heyucaai2001@163.com](mailto:heyucaai2001@163.com)

**Address:** <sup>a</sup> State Key Laboratory of Biocatalysis and Enzyme Engineering, Hubei Collaborative Innovation Center for Green Transformation of Bio-resources, Hubei Key Laboratory of Industrial Biotechnology, School of Life Sciences, Hubei University, Wuhan 430062, Hubei Province, P.R. China. <sup>b</sup> National-Local Joint Engineering Research Center of Biomass Refining and High-Quality Utilization, Jiangsu Key Laboratory of Advanced Catalytic Materials and Technology, School of Pharmacy, Changzhou University, Changzhou 213164, Jiangsu Province, P.R. China.

<sup>‡</sup>These authors have contributed equally to this manuscript.

## Figure Captions

**Fig. S1.** Image of recombinant plamid.

**Fig. S2.** The Circular Dichroism (CD) Spectra of KPB-treated (a), [ChCl][EG]–water-treated (b) and [ChCl][Gly]–water-treated  $\omega$ -transaminase proteins (c); T<sub>m</sub> values of KPB-treated (blank), [ChCl][EG]–water-treated and [ChCl][Gly]–water-treated  $\omega$ -transaminase proteins (d). [Protein samples were treated for 30 min in KPB (100 mM, pH 7.5) or DES–water (20:80, v:v; pH 8.0). KPB-treated and DES-water-treated  $\omega$ -transaminase proteins (0.10 mg/L) in 20 mM KPB (pH 7.5) were recorded from 180–260 nm (0.1 cm path length) at 20–80 °C].

**Fig. S3.** Themostability of  $\omega$ -transaminase in pRSFDuet-CV-AlaDH cells in KPB (200 mM, pH 8.0), [ChCl][Gly]–water (pH 8.0) and [ChCl][EG]–water (200 mM, pH 8.0) at 35 °C (a) and 50 °C (b). [The pRSFDuet-CV-AlaDH cells were treated for 0-4 h in KPB (200 mM, pH 8.0), [ChCl][Gly]–water (pH 8.0) and [ChCl][EG]–water (200 mM, pH 8.0) at 35 °C (a) and 50 °C (b), and then the cells were washed twice with KPB (200 mM, pH 8.0) for the determination of  $\omega$ -transaminase activity in KPB (200 mM, pH 8.0)]

**Fig. S4.** Biotransamination of 100 mM FAL into FLA in KPB, DES [ChCl][EG]–water or DES [ChCl][EG]–water at 35 °C and pH 8.0 (a); Effects of FAL loading (25–125 mM) on the biotransformation of FAL into FLA in KPB (200 mM, pH 8.0) (b), [ChCl][EG]–water (20:80, v:v) (c), and [ChCl][Gly]–water (20:80, v:v) (d).

**Fig. S5.** HPLC images of standards (FAL, FOL, and FLA), FLA liquor obtained from the biotransamination of 100 mM FAL in KPB (200 mM, pH 8.0), and FLA liquor obtained from the biotransamination of 100 mM FAL in [ChCl][EG]–water (20:80, v:v).

**Fig. S6.** Different amine donor *L*-alanine (*L*-Ala) (10.0 mol *L*-Ala/mol FAL), isopropylamine (IPA) (3.0 mol IPA/mol FAL) and NH<sub>4</sub>Cl (2.0 mol NH<sub>4</sub>Cl/mol FAL) on the biotransamination of 50-100 mM FAL into FLA at 35 °C and pH 8.0 [ChCl][EG]–water (20:80, v:v).

**Fig. S7.** Chemical and chemoenzymatic routes for the transamination of FAL into FLA.

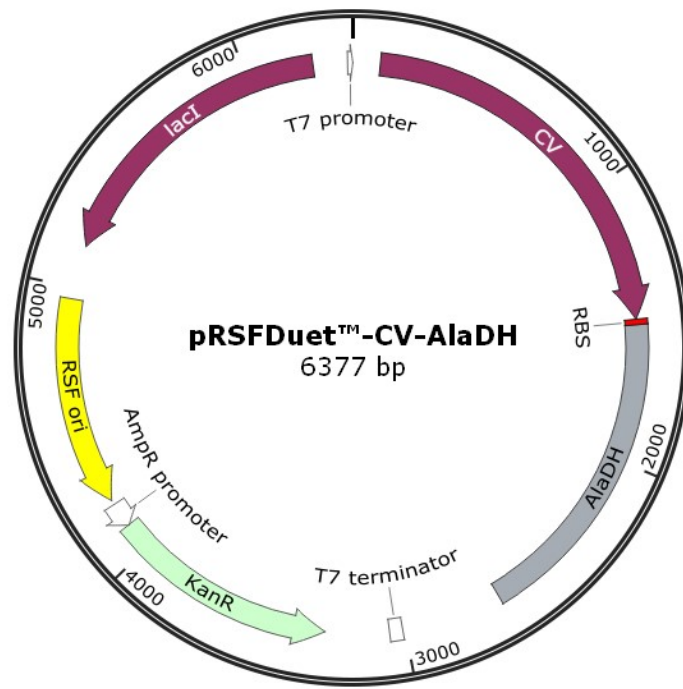

Fig. S1

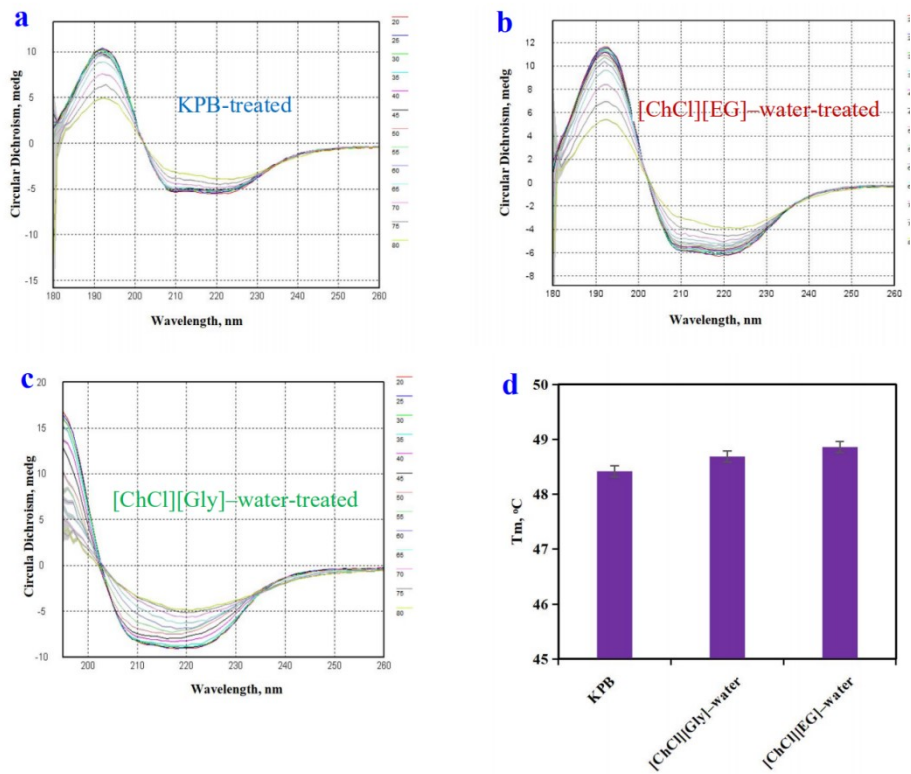

Fig. S2

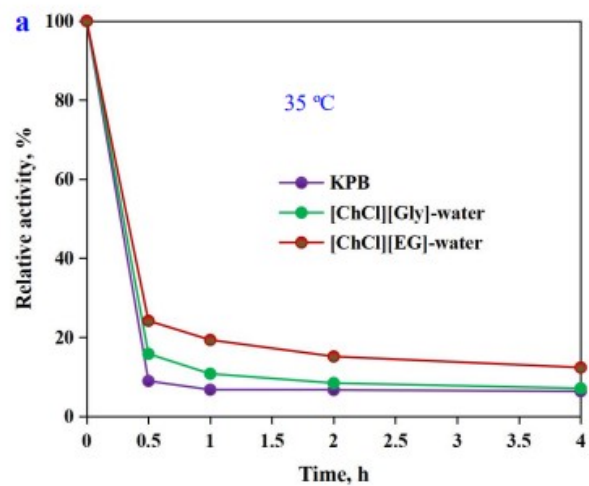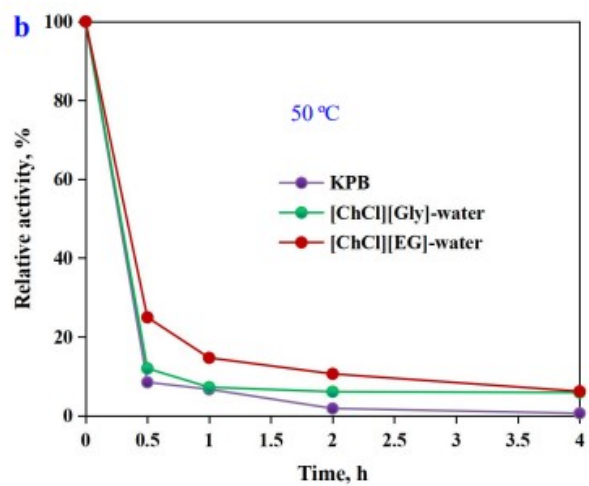

**Fig. S3**

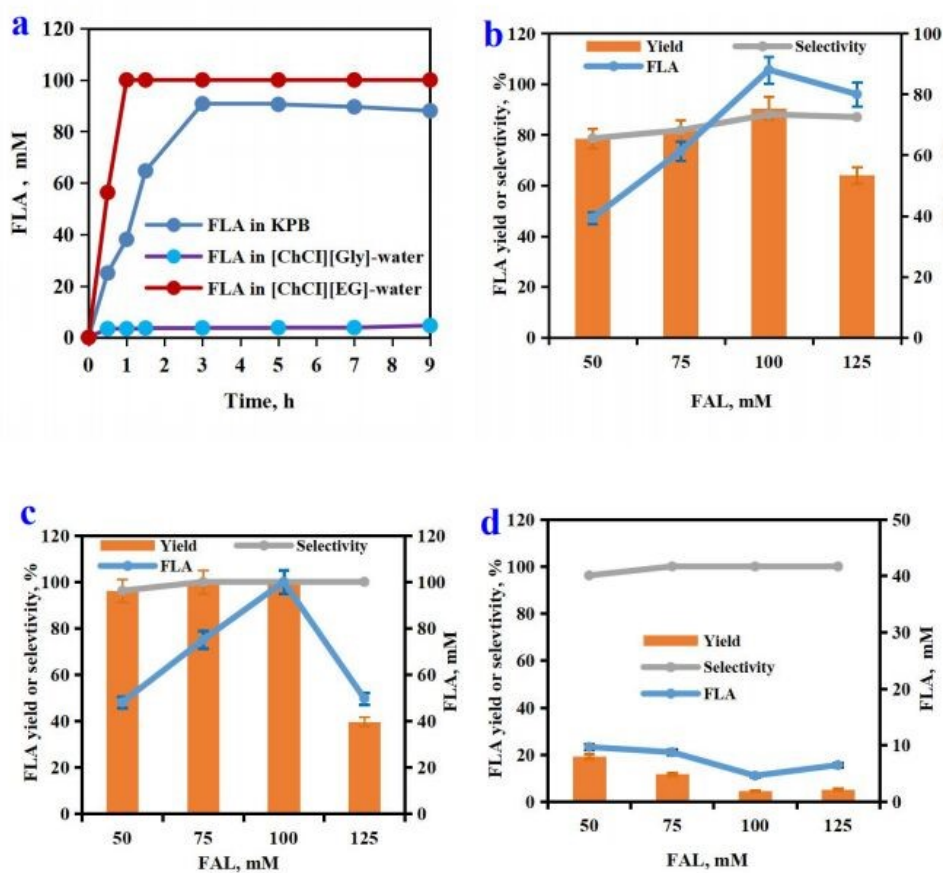

Fig. S4

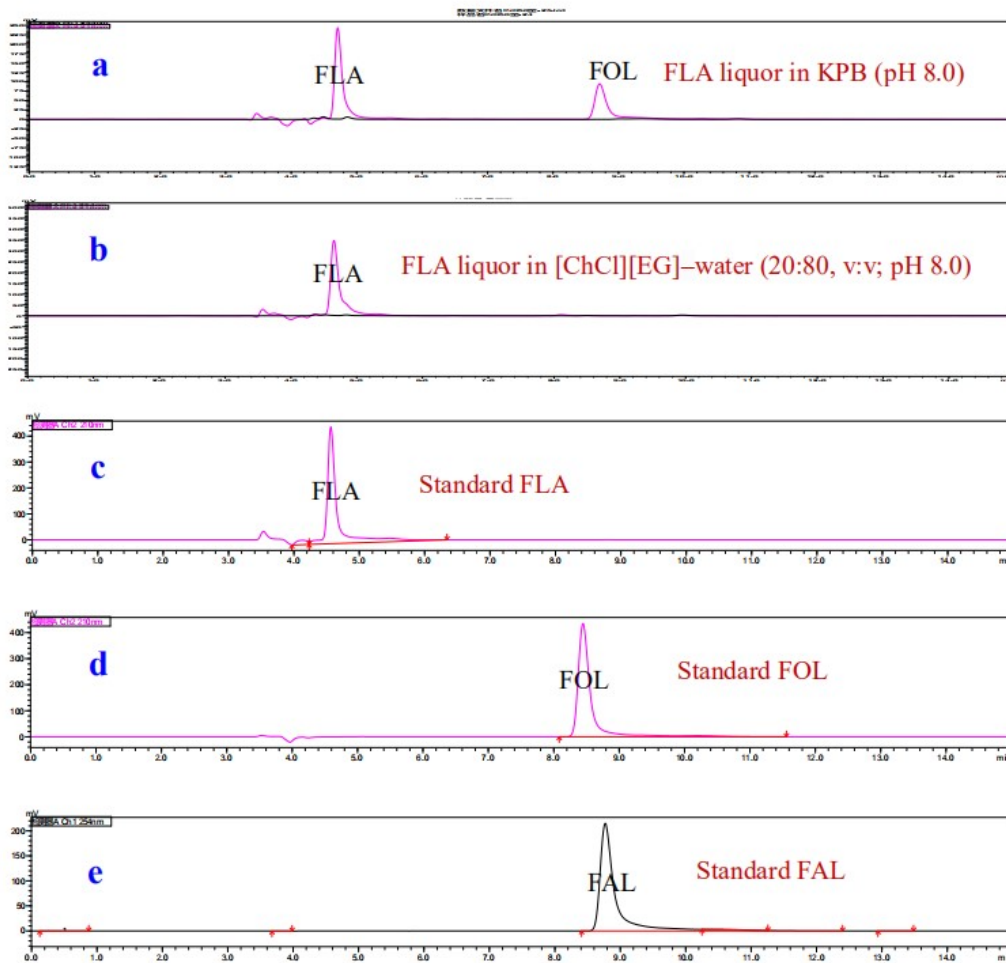

Fig. S5



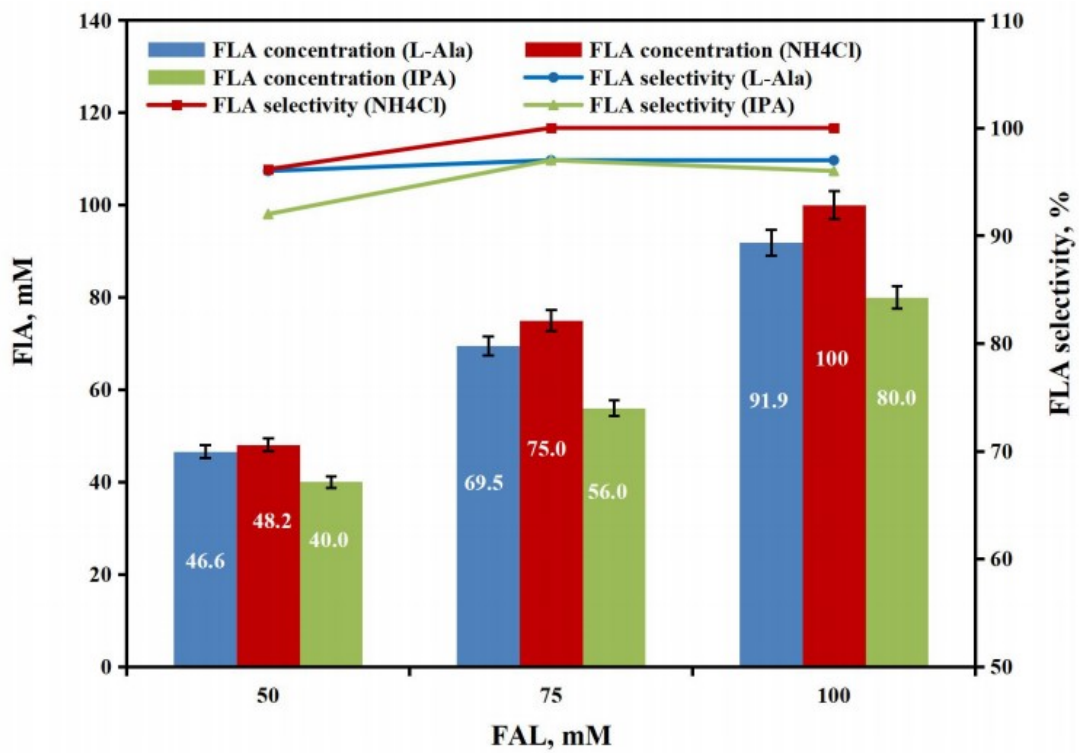

Fig. S6

### Traditional Chemical Route:

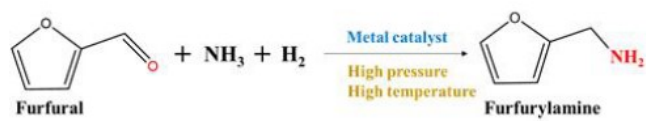

### Chemoenzymatic Route:

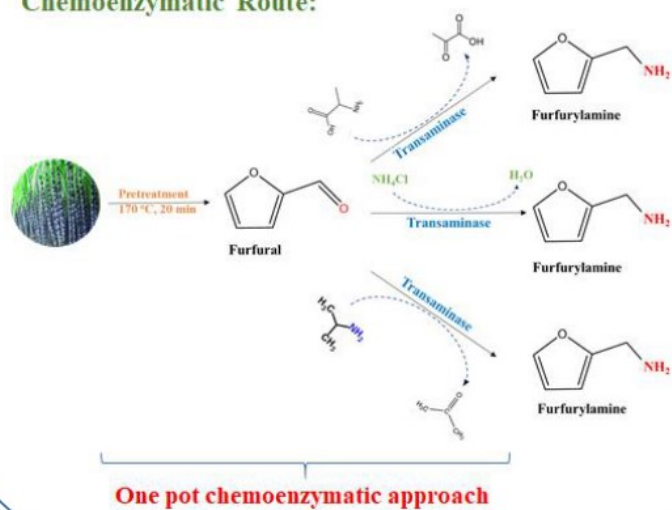

Fig. S7
